# Supplementary material for: Pop-up Questions Within Educational Videos: Effects on Students’ Learning
Source: Springer Nature journal article supplement (doi:10.1007/s10956-020-09847-3), 2020-08-06
Supplement: MOESM1 [file 18255218]

## Online Resource 1

Learning goals per educational video (translated from Dutch)

| Chapter | Video clip | Learning Goals                                                                                                                                                                                                                                                                                                                                                                                                                                                                                                                                                                                                                                                                                                                                                                                 |
|---------|------------|------------------------------------------------------------------------------------------------------------------------------------------------------------------------------------------------------------------------------------------------------------------------------------------------------------------------------------------------------------------------------------------------------------------------------------------------------------------------------------------------------------------------------------------------------------------------------------------------------------------------------------------------------------------------------------------------------------------------------------------------------------------------------------------------|
| 2       | 2.1        | <ol style="list-style-type: none"><li>1. Students can give the mass and atom number of a given element from the number of protons, electrons and neutrons and vice versa.</li><li>2. Students can explain the difference between two isotopes of one element.</li><li>3. Students can distribute electrons over the different types of orbitals within the first and second electron shell.</li></ol>                                                                                                                                                                                                                                                                                                                                                                                          |
|         | 2.2        | <ol style="list-style-type: none"><li>4. Students can determine the bonding types that can occur from the electronic distribution of an element.</li><li>5. Students can determine whether a covalent bonding is polar or apolar from electronegativity values.</li><li>6. Students can order bonding types from weak to strong.</li></ol>                                                                                                                                                                                                                                                                                                                                                                                                                                                     |
| 3       | 3.1        | <ol style="list-style-type: none"><li>7. Students can describe four important properties of water.</li><li>8. Students can provide a definition for pH, acids, bases and buffers.</li><li>9. Students can name the most important buffer in blood.</li><li>10. Students know what pKa values indicate.</li><li>11. Students can use pKa values to determine the charge of a structure at certain pH values</li></ol>                                                                                                                                                                                                                                                                                                                                                                           |
| 4       | 4.1        | <ol style="list-style-type: none"><li>12. Students can classify isomers into structural isomers, cis-trans isomers and stereo isomers</li><li>13. Students can provide the name and properties of the most important biochemical groups</li><li>14. Students can determine whether a carbon atom is asymmetric and can explain which isomer requires asymmetric atoms</li><li>15. Students can draw the phosphate groups in ATP</li><li>16. Student can provide the name of the sugar in ATP.</li></ol>                                                                                                                                                                                                                                                                                        |
| 5       | 5.1        | <ol style="list-style-type: none"><li>17. Students can explain whether chemical reactions are hydrolysis or dehydration reactions and can also draw examples of both reaction types.</li><li>18. Students can provide the general molecular formula of sugars.</li><li>19. Students can classify sugars into aldehydes and ketones.</li><li>20. Students can provide the names of the sugars that store glucose for energy in both animals and plants</li><li>21. Students can explain that glucose is mainly present as a ring structure when in solution.</li><li>22. Students can explain the difference between <math>\alpha</math> and <math>\beta</math> glucose.</li><li>23. Students can explain the difference in structure and function of cellulose, glycogen and starch.</li></ol> |
|         | 5.2        | <ol style="list-style-type: none"><li>24. Students can explain the differences between saturated and unsaturated fatty acids.</li><li>25. Students can explain whether a structure is a lipid and whether a lipid is a fatty acid, phospholipid or steroid.</li></ol>                                                                                                                                                                                                                                                                                                                                                                                                                                                                                                                          |
|         | 5.3        | <ol style="list-style-type: none"><li>26. Students can describe the general chemical structure of amino acids.</li><li>27. Students can classify amino acids into hydrophilic, hydrophobic and charged amino acids from their structural formulas.</li><li>28. Students can provide the names of the three amino acids that can be phosphorylated by a kinase.</li><li>29. Students can provide a definition for primary, secondary, tertiary and quaternary protein structures.</li><li>30. Students can describe the function of chaperone proteins.</li></ol>                                                                                                                                                                                                                               |
|         | 5.4        | <ol style="list-style-type: none"><li>31. Students can name the structural components of a nucleotide.</li><li>32. Students can explain that nucleic acids are polar.</li><li>33. Students can draw the chemical structure of a nucleic acid.</li></ol>                                                                                                                                                                                                                                                                                                                                                                                                                                                                                                                                        |

|   |     |                                                                                                                                                                                                                                                                                                                                                                                                                                                                                                                                                                                                                                                                                                                            |
|---|-----|----------------------------------------------------------------------------------------------------------------------------------------------------------------------------------------------------------------------------------------------------------------------------------------------------------------------------------------------------------------------------------------------------------------------------------------------------------------------------------------------------------------------------------------------------------------------------------------------------------------------------------------------------------------------------------------------------------------------------|
| 6 | 6.1 | <p>34. Students can classify chemical reactions into catabolic and anabolic reactions and provide examples of both reactions.</p> <p>35. Students can explain the difference between kinetic and potential energy.</p> <p>36. Students can describe the first two laws in thermodynamics.</p> <p>37. Students can explain what free energy (<math>\Delta G</math>) encompasses and can provide the formula to calculate the free energy from enthalpy and entropy.</p> <p>38. Students can differentiate between exogenic and endogenic reactions and explain whether these reactions have positive or negative <math>\Delta G</math> values.</p> <p>39. Students can explain how non-spontaneous reactions can occur.</p> |
|   | 6.2 | <p>40. Students can describe the function of enzymes and explain that they contain active sites and are substrate specific.</p> <p>41. Students can name factors that influence the function of enzymes.</p> <p>42. Students can explain that enzymes lower the <math>E_a</math> value, but do not lower <math>\Delta G</math>.</p> <p>43. Students can provide a definition for allosteric regulation.</p> <p>44. Students can classify inhibitors into competitive and non-competitive inhibitors.</p> <p>45. Students can explain the meaning of positive and negative feedback mechanisms.</p>                                                                                                                         |
| 7 | 7.1 | 46. Students can describe the differences between eukaryotic and prokaryotic cells.                                                                                                                                                                                                                                                                                                                                                                                                                                                                                                                                                                                                                                        |
|   | 7.2 | 47. Students can define and describe the function of the following cell organelles: nucleus, ribosomes, smooth ER, rough ER, Golgi apparatus, endosomes, lysosomes, vacuoles, mitochondria, chloroplasts and peroxisomes.                                                                                                                                                                                                                                                                                                                                                                                                                                                                                                  |
|   | 7.3 | <p>48. Students can determine whether a protein is synthesized by free or bound ribosomes from their final destination.</p> <p>49. Students can describe the route of plasma membrane proteins from the site of production to the plasma membrane.</p> <p>50. Students can name three functions of the SRP protein.</p> <p>51. Students can explain where proteins are glycosylated.</p> <p>52. Students can name the organelles of the endomembrane system.</p> <p>53. Students can describe phagocytosis and autophagy.</p> <p>54. Students can describe how lysosomal enzymes are transported to the lysosomes.</p> <p>55. Students can describe how proteins are sorted in the trans-Golgi.</p>                        |
|   | 7.4 | <p>56. Students can name three types of cytoskeleton structures.</p> <p>57. Students can provide the main functions and structure of microtubules, microfilaments and intermediary filaments.</p> <p>58. Students can provide the function of cell walls and extracellular matrices and know in which cell types these structures can be found.</p> <p>59. Students can provide the different functions of plasmodesmata, tight junctions, desmosomes and gap junctions.</p>                                                                                                                                                                                                                                               |
| 8 | 8.1 | <p>60. Students can predict in which net direction a solute will be transported across a selective permeable membrane.</p> <p>61. Students can describe the structure and components of cellular membranes.</p> <p>62. Students can explain how temperature, fatty acid structure and cholesterol affect the fluidity of cell membranes.</p> <p>63. Students can explain that the monolayers of the cellular membrane differ in lipid composition.</p> <p>64. Students can describe in which monolayer carbohydrates can be found and how they function in cellular recognition.</p> <p>65. Students can explain that the membrane structure affects the selective permeability of the membrane.</p>                       |
|   | 8.2 | <p>66. Students can explain the difference between passive transport, active transport and co-transport.</p> <p>67. Students can explain the difference between phagocytosis, pinocytosis and receptor mediated endocytosis.</p>                                                                                                                                                                                                                                                                                                                                                                                                                                                                                           |

|    |      |                                                                                                                                                                                                                                                                                                                                                                                                                                                                                                                                                                                                                                                                                                                                                                                                                                                                                                                                                                                                                                                                                                                                                                                                                                                 |
|----|------|-------------------------------------------------------------------------------------------------------------------------------------------------------------------------------------------------------------------------------------------------------------------------------------------------------------------------------------------------------------------------------------------------------------------------------------------------------------------------------------------------------------------------------------------------------------------------------------------------------------------------------------------------------------------------------------------------------------------------------------------------------------------------------------------------------------------------------------------------------------------------------------------------------------------------------------------------------------------------------------------------------------------------------------------------------------------------------------------------------------------------------------------------------------------------------------------------------------------------------------------------|
|    |      | <p>68. Students can describe the process of receptor mediated endocytosis.</p> <p>69. Students can explain how receptors that need to be recycled are separated from receptors that need to be degraded.</p>                                                                                                                                                                                                                                                                                                                                                                                                                                                                                                                                                                                                                                                                                                                                                                                                                                                                                                                                                                                                                                    |
| 9  | 9.1  | <p>70. Students can explain how cells can communicate and provide responses to certain external/internal signals.</p> <p>71. Students can provide examples and definitions for different types of short-distance and long-distance cell-cell communication</p> <p>72. Students can name three stages of cell signaling (reception, transduction and response)</p> <p>73. Students can explain how a ligand can stimulate signaling pathway through binding of a receptor.</p> <p>74. Students can explain the difference in signaling pathway for hydrophilic and hydrophobic signals</p> <p>75. Students can explain how different signaling molecules can bind to similar receptors resulting in different signaling pathways.</p> <p>76. Students can describe the general cell signaling pathway of G-protein coupled receptors.</p> <p>77. Students can explain how G-proteins are activated and inactivated.</p> <p>78. Students can describe the functions of guanosine exchange factor and GTPase.</p> <p>79. Students can explain the general function of kinases.</p> <p>80. Students can describe how tyrosine kinases are activated and deactivated.</p> <p>81. Students can explain the function of ligand gated ion channels.</p> |
|    | 9.2  | <p>82. Students can describe the cell signaling pathway resulting in amplification of cAMP.</p> <p>83. Students can describe the cell signaling pathway resulting in amplification of <math>Ca^{2+}</math>.</p> <p>84. Students can describe the mechanism and function of phosphorylation and dephosphorylation in signal transduction and explain that these mechanisms are regulated by kinases and phosphatases.</p> <p>85. Students can describe what second messengers are and provide the function of cAMP, <math>Ca^{2+}</math>, DAG and IP3 in general signaling pathways.</p> <p>86. Students can describe the general functions of cAMP, AMP, phosphodiesterase and adenylyl cyclase.</p> <p>87. Students can explain that transcription and cytoplasmic activities can be affected by cell signaling.</p> <p>88. Students can describe the function of scaffolding proteins.</p>                                                                                                                                                                                                                                                                                                                                                    |
|    | 9.3  | <p>89. Students can describe the function of apoptosis in embryonic development and explain that this process is regulated by signaling pathways.</p>                                                                                                                                                                                                                                                                                                                                                                                                                                                                                                                                                                                                                                                                                                                                                                                                                                                                                                                                                                                                                                                                                           |
| 10 | 10.1 | <p>90. Students can explain the difference between catabolic and anabolic pathways.</p> <p>91. Students can describe the processes of fermentation and aerobic respiration and describe whether each of these requires oxygen.</p> <p>92. Students can explain the difference between oxidation and reduction.</p> <p>93. Students can select the electron donor, reducing agent, electron acceptor and oxidizing agent of a redox reaction.</p> <p>94. Students can explain whether oxidation occurred in specific reactions during cellular respiration.</p> <p>95. Students can describe the three steps of aerobic respiration.</p>                                                                                                                                                                                                                                                                                                                                                                                                                                                                                                                                                                                                         |
|    | 10.2 | <p>96. Students can describe the main steps of glycolysis, the location of glycolysis and the amount of ATP and NADH that are produced during this process.</p>                                                                                                                                                                                                                                                                                                                                                                                                                                                                                                                                                                                                                                                                                                                                                                                                                                                                                                                                                                                                                                                                                 |
|    | 10.3 | <p>97. Students can explain how glycolysis is connected to the citric acid cycle.</p> <p>98. Students can give the amount of ATP, NADH and <math>FADH_2</math> formed during the citric acid cycle.</p>                                                                                                                                                                                                                                                                                                                                                                                                                                                                                                                                                                                                                                                                                                                                                                                                                                                                                                                                                                                                                                         |
|    | 10.4 | <p>99. Students can describe how electrons move to a lower energetic stage within the electron transport chain and explain the role of <math>NAD^+</math> and NADH during this process.</p>                                                                                                                                                                                                                                                                                                                                                                                                                                                                                                                                                                                                                                                                                                                                                                                                                                                                                                                                                                                                                                                     |

|    |      |                                                                                                                                                                                                                                                                                                                                                                                                                                                                                                                                                                                                                                                                                                                                                                                                                                                                                                                                                                                                       |
|----|------|-------------------------------------------------------------------------------------------------------------------------------------------------------------------------------------------------------------------------------------------------------------------------------------------------------------------------------------------------------------------------------------------------------------------------------------------------------------------------------------------------------------------------------------------------------------------------------------------------------------------------------------------------------------------------------------------------------------------------------------------------------------------------------------------------------------------------------------------------------------------------------------------------------------------------------------------------------------------------------------------------------|
|    |      | <p>100. Students can describe how chemiosmosis is coupled to ATP synthesis during oxidative phosphorylation and where each of these processes occurs.</p> <p>101. Students can explain the difference between oxidative phosphorylation and substrate level phosphorylation.</p> <p>102. Students can provide a definition for ATP synthase, chemiosmosis, cytochrome, ubiquinone, electron carriers and proton motive force.</p> <p>103. Students can explain the function of fermentation and describe the differences between alcohol fermentation and lactic acid fermentation.</p> <p>104. Students can give the amount of ATP, NADH and FADH<sub>2</sub> formed during glycolysis when no oxygen is present.</p> <p>105. Students can explain the function of beta oxidation.</p> <p>106. Students can describe the feedback mechanism of cellular respiration.</p> <p>107. Students can name the three most important components to be catabolized.</p>                                        |
| 11 | 11.1 | <p>108. Students can explain the difference between autotrophic and heterotrophic organisms.</p> <p>109. Students can describe the location and net reaction of photosynthesis and explain why this reaction is a redox reaction.</p> <p>110. Students can explain how light energy is converted to chemical energy to ATP and NADPH.</p> <p>111. Students can provide a definition for photophosphorylation, carbon fixation, NADP<sup>+</sup> and NADPH.</p> <p>112. Students can explain which spectrum is most effective for photosynthesis from the results of Engelmann's experiment.</p> <p>113. Students can explain that pigments in the thylakoid differ in their absorption spectrum.</p>                                                                                                                                                                                                                                                                                                  |
|    | 11.2 | <p>114. Students can provide a definition for photosystem, primary electron acceptor, reaction centre and light harvesting complex.</p> <p>115. Students can describe how photosystem II is connected to photosystem I.</p> <p>116. Students can describe how linear electron flow yield ATP and NADPH.</p>                                                                                                                                                                                                                                                                                                                                                                                                                                                                                                                                                                                                                                                                                           |
|    | 11.3 | <p>117. Students can explain the difference between linear and cyclic electron flow.</p> <p>118. Students can describe the components that enter and leave the Calvin cycle.</p> <p>119. Students can describe the function of Rubisco.</p>                                                                                                                                                                                                                                                                                                                                                                                                                                                                                                                                                                                                                                                                                                                                                           |
| 12 | 12.1 | <p>120. Students can provide a definition for somatic cells, gametes, sister chromatids, centromeres, kinetochores and cytokinesis.</p> <p>121. Students can calculate the number of chromosomes, chromatids and centromeres in each cell cycle stage from a given chromosome number in somatic cells.</p> <p>122. Students can explain which processes occur during M phase, G1 phase, S phase and G2 phase.</p> <p>123. Students can describe, name and recognize the phases of mitosis.</p> <p>124. Students can explain how sister chromatids are held together and pulled apart during anaphase.</p> <p>125. Students can explain the differences between kinetochore and non-kinetochore microtubules.</p> <p>126. Students can provide a definition for centrosome and centrioles.</p> <p>127. Students can describe the components of the mitotic spindle and explain where assembly of the spindle starts.</p> <p>128. Students can explain the mechanism of binary fission of bacteria.</p> |
|    | 12.2 | <p>129. Students can explain how the eukaryotic cell cycle is regulated by a molecular control system.</p> <p>130. Students can explain how the cell cycle is regulated by cyclins, cyclin dependent kinases.</p> <p>131. Students can describe the activity and concentration of specific cyclins and cyclin dependent kinases during a specific cell cycle stage.</p> <p>132. Students can name three important checkpoints of the cell cycle.</p> <p>133. Students can explain how loss of checkpoints can result in cancer.</p>                                                                                                                                                                                                                                                                                                                                                                                                                                                                   |
