# Supplementary material for: Pop-up Questions Within Educational Videos: Effects on Students’ Learning
Source: Springer Nature journal article supplement (doi:10.1007/s10956-020-09847-3), 2020-08-06
Supplement: MOESM2 [file 18255218]

## Online Resource 2

Evaluation survey on video platform ScalableLearning for study 1 (translated from Dutch)

In this years' molecular biology course, we embedded video clips in the platform ScalableLearning. We aim to investigate whether and how the tools on Scalable Learning help you studying. This questionnaire is aimed to evaluate your use and experiences in Scalable Learning.

We ask you to fill in your student number for analysis on student performance. The provided information is only used for this specific research and the presented results will not be traceable to specific students. It is not obligatory to answer the questionnaire questions.

It takes about 10 to 15 minutes to fill in this questionnaire. Answer the questions as best possible.

### A. Personal Information

1. What is your student number?

### B. Watching video clips

2.

a. Did you watch video clips within the video platform Scalable Learning?

- Yes → proceed to question 2b  
 No → proceed to question 2c

b. The first part of the course contained 29 video clips in total. Estimate the total number of video clips you've seen. Draw a cross within the box containing this number below.

|   |   |   |   |   |    |    |    |    |    |    |    |    |    |    |
|---|---|---|---|---|----|----|----|----|----|----|----|----|----|----|
| 0 | 2 | 4 | 6 | 8 | 10 | 12 | 14 | 16 | 18 | 20 | 22 | 24 | 26 | 29 |
|   |   |   |   |   |    |    |    |    |    |    |    |    |    |    |

c. Explain why you did not watch any video clips. Multiple answers are possible.

- I did not have a login code for Scalable Learning  
 I had problems using my computer/laptop/tablet  
 I did not see any added value of using video clips  
 I already watched all video clips in molecular biology last year  
 Other (specify) .....

3. Please indicate how strongly you agree or disagree with the following statements.

|                                                                                          | Strongly disagree     | Disagree              | Neutral               | Agree                 | Strongly Agree        | Not applicable        |
|------------------------------------------------------------------------------------------|-----------------------|-----------------------|-----------------------|-----------------------|-----------------------|-----------------------|
| “I rather watch video clips wherein the teachers’ head is visible.”                      | <input type="radio"/> |
| “The video clips helped me in learning.”                                                 | <input type="radio"/> |
| “The video clips were a good preparation for the online tests.”                          | <input type="radio"/> |
| “The video clips were a good preparation for the individual tests in Mastering Biology.” | <input type="radio"/> |
| “The video clips were a good preparation for the in-class assignments.”                  | <input type="radio"/> |

**C. Asking questions**

4.

a. Did you ask a question/questions within the ScalableLearning platform?

- Yes → proceed to question 3b
- No → proceed to question 3c

b. Estimate the total number of questions you’ve asked in ScalableLearning. Draw a cross within the box containing this number below.

|   |   |   |   |   |    |    |    |    |    |    |
|---|---|---|---|---|----|----|----|----|----|----|
| 0 | 2 | 4 | 6 | 8 | 10 | 12 | 14 | 16 | 18 | 20 |
|   |   |   |   |   |    |    |    |    |    |    |

c. Explain why you did not ask any questions. Multiple answers are possible.

- It was not necessary: I understood everything
- I did not know this option was available
- I did not know how to use this option
- I felt restrained to use this option
- I asked my questions in other ways
- Other (specify): .....





12. Please indicate how strongly you agree or disagree with the following statements.

|                                                                     | Strongly disagree     | Disagree              | Neutral               | Agree                 | Strongly Agree        | Not applicable        |
|---------------------------------------------------------------------|-----------------------|-----------------------|-----------------------|-----------------------|-----------------------|-----------------------|
| "Answering pop-up questions helped me in learning."                 | <input type="radio"/> |
| "I would rather have less pop-up questions within the video clips." | <input type="radio"/> |

**G. General**

13. What did you like about ScalableLearning?

14. What could be improved about ScalableLearning?

**Thank you for participating in this survey.**

Do you want to keep informed on the results of this survey? If so, please provide your student mail address below.
