# Supplementary material for: Pop-up Questions Within Educational Videos: Effects on Students’ Learning
Source: Springer Nature journal article supplement (doi:10.1007/s10956-020-09847-3), 2020-08-06
Supplement: MOESM3 [file 18255218]

## Online Resource 3

Pop-up questions with corresponding test questions for study 2 (translated from Dutch)

### Chapter 2 - Atoms and Molecules

---

#### ITEM 1 – LEARNING GOAL 1

##### Test question

How many valence electrons does the atom N (nitrogen) contain?

- A. 2
- B. 4
- C. 5
- D. 8

##### Pop-up question

The half-life of isotope  $^{33}\text{P}$  is 25 days. The atomic number of phosphorus is 15 (see periodic system). How many neutrons and valence electrons does isotope  $^{33}\text{P}$  contain?

- A. 18 neutrons and 15 valence electrons
- B. **18 neutrons and 5 valence electrons**
- C. 17 neutrons and 15 valence electrons
- D. 17 neutrons and 5 valence electrons

Feedback per answer: Phosphorus contains 15 electrons, but not all of them are valence electrons / Phosphorus contains  $(33-15=)$  18 neutrons. Phosphorus contains 15 electrons within three electron shells (2, 8, 5). Five electrons are present in the outer electron shell. / Phosphorus contains 15 electrons, but not all of them are valence electrons / The number of neutrons is equal to the mass number minus the atomic number

### Chapter 3 Chemistry of Water

---

#### ITEM 2 – LEARNING GOAL 11

##### Test question

The amino acid glycine contains a carboxyl group with pKa value 2.3 and an amino group with pKa value 9.6. What is the structural formula for glycine at pH=2, pH=7 and pH=12?

Match the pH levels with the following structural formulas.

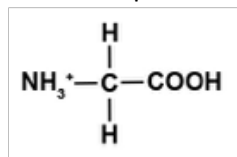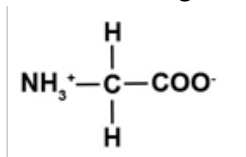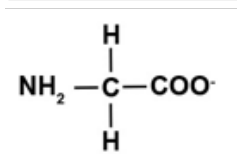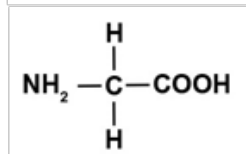

##### Pop-up question

What is the molecular formula for the N-terminus of an amino acid with pKa value 10 at pH=2,

pH=7 and pH=12?

- A. **pH=2: NH<sub>3</sub><sup>+</sup>**
- B. pH=2: NH<sub>2</sub>
- C. **pH=7: NH<sub>3</sub><sup>+</sup>**
- D. pH=7: NH<sub>2</sub>
- E. pH=12: NH<sub>3</sub><sup>+</sup>
- F. **pH=12: NH<sub>2</sub>**

Feedback: No feedback provided

## **Chapter 4 Carbon: The Basis of Molecular Diversity**

---

ITEM 3 – LEARNING GOAL 14

### **Test question**

Which of the carbon atoms within the structural formula below is asymmetric?

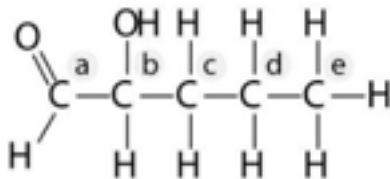

- A. *a*
- B. *b***
- C. *c*
- D. *d*
- E. *e*

### **Pop-up question**

Which of the following amino acids does not contain asymmetric carbon atoms (See Figure 5.14, Campbell & Reece, Biology 11<sup>th</sup> global edition)?

- A. Proline
- B. Alanine
- C. Glycine**
- D. None

Feedback: *All amino acids contain one asymmetric carbon atom except for glycine. The side chain of glycine is H.*

## **Chapter 5 Biological Macromolecules and Lipids**

---

ITEM 4 – LEARNING GOAL 25

### **Test question**

Why are human sex hormones considered to be lipids?

- A. Sex hormones mix poorly with water**
- B. Sex hormones are made of fatty acids
- C. Sex hormones are hydrophilic components
- D. Sex hormones contribute to atherosclerosis

- E. Sex hormones are essential components of cell membranes

**Pop-up question**

Which of the following statements account for all lipids?

- A. Lipids mix poorly with water**
- B. Lipids are made of glycerol and fatty acids
- C. Lipids contain nitrogen
- D. Lipids possess low energy

Feedback per answer: *All lipids are hydrophobic / Steroids are a certain group of lipids / All lipids do contain carbon and hydrogen / Most lipids possess high energy*

ITEM 5 – LEARNING GOAL 26

**Test question**

Which of the following molecules will be labeled when cultured in a medium with radioactive  $^{35}\text{S}$ ?

- A. Phospholipids
- B. Nucleic acids
- C. Carbohydrates
- D. Proteins**
- E. Proteins and Nucleic acids

**Pop-up question**

You add radioactive sulfur ( $^{35}\text{S}$ ) to a cell culture. Which macromolecule will become radioactively labeled?

- A. Lipids
- B. Proteins**
- C. Nucleic acids
- D. Sugars

No feedback provided

**Chapter 6 Energy and Life**

---

ITEM 6 – LEARNING GOAL 37 & 38

**Test question**

How does the free energy, total energy and entropy change when glucose monomers form a cellulose polymer? – is decrease; + increase

- A.  $+\Delta G, +\Delta H, +\Delta S$
- B.  $+\Delta G, +\Delta H, -\Delta S$**
- C.  $-\Delta G, +\Delta H, +\Delta S$
- D.  $+\Delta G, -\Delta H, -\Delta S$
- E.  $+\Delta G, -\Delta H, +\Delta S$

Feedback: The production of glucose from a cellulose polymer is anabolic and costs energy. Therefore, the total energy ( $\Delta H$ ) increases. The order increases, thus entropy ( $\Delta S$ ) decreases. Together with the function  $\Delta G = \Delta H - T\Delta S$ , it can be concluded that free energy ( $\Delta G$ ) increases.

### Pop-up question

A chemical reaction can proceed when entropy increases. In which of the following reactions does entropy increase?

- A.  $A+B \rightarrow C+D$
- B.  $A+B+C \rightarrow D$
- C.  $A \rightarrow B+C$
- D.  $A+B+C \rightarrow D+E+F$

Feedback per answer: *The entropy does not change / The entropy decreases / The entropy increases / The entropy does not change*

## Chapter 8 Cell Membranes

---

### ITEM 7 – LEARNING GOAL 60

#### Test question

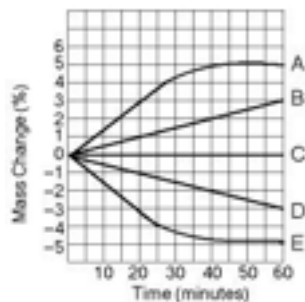

The figure above depicts the mass change of five dialysis bags filled with different concentrations of sucrose. The membranes of the bags are semipermeable and impermeable for sucrose. The five bags are placed in different beakers with a concentration of 0.6 M sucrose. After each 10 minutes, the weight of the bags is measured. The percentage in weight difference for every bag is presented in the graph above.

Which bag contained the highest start concentration of sucrose?

- A. **A**
- B. B
- C. C
- D. D
- E. E

### Pop-up question

An artificial liposome without membrane proteins is cultured in a 0,03 M sucrose solution and placed in pure water. Which of the following answer best describes what happens?

- A. Sucrose diffuses from the liposome
- B. Nothing will happen because no membrane proteins are present
- C. **Water will diffuse in the liposome and the liposome will burst out at a certain moment.**
- D. Water will be pushed out of the liposome and hence the liposome will shrink.

Feedback: *See textbook. Proteins are needed for transport of sucrose.*

## Chapter 9 Cell Signaling

---

ITEM 8 – LEARNING GOAL 71

**Test question**

A cell sends of a signal molecule to its environment and a few cells within the environment respond. How do we call this type of signaling?

- A. autocrine signaling
- B. synaptic signaling
- C. **paracrine signaling**
- D. endocrine signaling
- E. signaling through Gap-Junctions

**Pop-up question**

We just discussed endocrine, paracrine and synaptic signaling. Which of these three systems has the most specific interaction between receptor and ligand?

- A. **Endocrine**
- B. Paracrine
- C. Synaptic signaling

No feedback provided

ITEM 9 – LEARNING GOAL 86

**Test question**

Which of the following associations is incorrect?

- A. Kinase activity and the addition of phosphate groups
- B. **Phosphodiesterase activity and the removal of phosphate groups**
- C. GTPase activity and hydrolysis of GTP to GDP
- D. Guanine Exchange Factor and the exchange of GDP to GTP
- E. Adenylyl Cylcase activity and the conversion of AMP to cAMP

**Pop-up question**

The enzyme adenylyl cyclase has the opposite effect of the enzyme..

- A. Protein Phosphatase
- B. Kinase
- C. **Phosphodiesterase**

No Feedback provided

**Chapter 10 Cell Respiration**

---

ITEM 10 – LEARNING GOAL 93

**Test question**

During the transfer of  $\text{NAD}^+$  to  $\text{NADH}$ ,  $\text{NAD}^+$  is ...

- A. Hydrolysed
- B. Oxidized
- C. **Reduced**
- D. I don't know

**Pop-up question**

In a short time, we will discuss the following fermentation reaction: pyruvate + NADH → lactate + NAD<sup>+</sup>. What is the name of the enzyme in this reaction?

- A. **Lactate dehydrogenase**
- B. Pyruvate dehydrogenase

Feedback: *Pyruvate is reduced.*

## ITEM 11 – LEARNING GOAL 97

**Test question**

What happens with the citric acid cycle when no oxygen is present?

- A. **It stops because NAD<sup>+</sup> and FAD become depleted.**
- B. It stops because ADP increases in the absence of oxygen.
- C. It continues because no oxygen is needed within any of the reactions in the citric acid cycle.
- D. It continues because ATP concentration is lowered which thereby activates enzymes of the citric acid cycle

**Pop-up question**

What is the purpose of fermentation?

- A. Production of alcohol and lactate to provide energy in cells without oxygen.
- B. Production of extra ATP when respiration does not produce enough ATP.
- C. **Conversion of NADH to NAD<sup>+</sup>, which can then be used for glycolysis.**

No feedback provided

**Chapter 11 Photosynthetic Processes**

---

## ITEM 12 – LEARNING GOAL 93

**Test question**

The reducing agent of the Calvin cycle is...

- A. **NADPH**
- B. ATP
- C. Oxygen
- D. NADH

**Pop-up question**

What is the electron acceptor during the electron transport in chloroplasts?

- A. O<sub>2</sub>
- B. H<sub>2</sub>O
- C. Ferredoxine (Fd)
- D. NAD<sup>+</sup>
- E. **NADP<sup>+</sup>**

No feedback provided

**Chapter 12 Mitosis**

---

ITEM 13 – LEARNING GOAL 121

**Test question**

If a cell in anaphase contains 20 centromeres, how many chromosomes does every daughter cell contain after cytokinesis?

- A. **10**
- B. 20
- C. 40
- D. 80

**Pop-up question**

How many chromosomes does the central cell contain in the figure below?

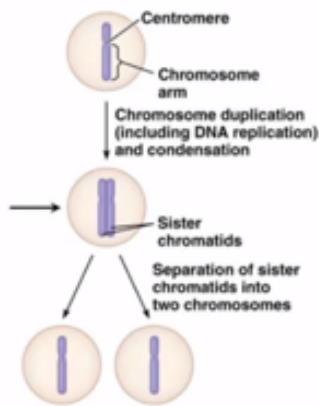

- A. **1**
- B. 2
- C. 4

Feedback: *The central cell contains only one chromosome but two chromatids.*

**Chapter 13 Sexual Life Cycle and Meiosis**

---

ITEM 14 – LEARNING GOAL 123

**Test question**

Look at the figure below. In which phase does this process takes place?

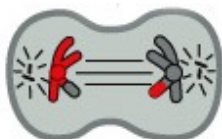

- A. Mitosis – metaphase
- B. Mitosis – anaphase
- C. Meiosis I – metaphase
- D. **Meiosis I – anaphase**
- E. Meiosis II – metaphase
- F. Meiosis II - anaphase

**Pop-up question**

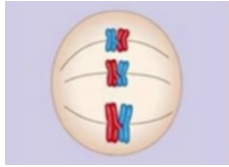

Which phase is presented in the figure above?

- A. **Meiosis 1 metaphase**
- B. Meiosis 1 prophase
- C. Meiosis 2 metaphase
- D. Mitotic metaphase
- E. Meiosis 2 prophase

No feedback provided
