# Supplementary material for: Pop-up Questions Within Educational Videos: Effects on Students’ Learning
Source: Springer Nature journal article supplement (doi:10.1007/s10956-020-09847-3), 2020-08-06
Supplement: MOESM5 [file 18255218]

## Online Resource 5

Interview questions on students' use of pop-up questions for study 4A (translated from Dutch)

### Viewing behavior

1. How do you act when a pop-up question appears?
  - a. Do you just click on one of the answers or do you think about the question?
  - b. Do you rewind the video?
  - c. Do you search for information in the textbook?
  - d. Do you make notes?
  - e. Do you click through the answers?
2. Do you watch the video clip within one go?
  - a. Do you pause the video clip? If so, when and why? What are you doing during these pauses?
  - b. Do you rewind the video clip? If so, when and why?
  - c. Do you skip fragments within the video clip? If so, when and why?
3. Do you watch video clips together with a fellow student?
  - a. If so, when and why? What do you discuss together?
4. Do you have the feeling that you understand the concepts and are prepared for the exam after watching the video clip?
5. Did you watch video clips differently when pop-up questions were absent?

### Exam preparation

6. How do you prepare for the exam after watching the video clips?
  - a. Do you make a summary of the video clip?
  - b. Do you read the textbook? Do you make a summary of the textbook?
  - c. Do you watch the video clips again?
  - d. Do you study together with a fellow student? If so, what do you discuss?

### Online individual tests and pop-up questions

7. Are the online individual test questions less or more difficult compared to the pop-up questions? If so, why?
8. Did you expect these type of test questions based on the pop-up questions? Why?
9. What is your opinion on the direct feedback after answering pop-up questions and the possibility to thereafter click on the other answer possibilities?
10. Would you think more thoroughly on what the possible answer could be when you would receive the answers and feedback to the pop-up questions just after watching the video-clip?
11. What if you would receive the answers and feedback to the pop-up questions one week later?
  - a. Would you think more thoroughly on what the possible answer could be?
  - b. Would you discuss these questions more often with fellow students?
  - c. Would you use your text book more often?
