# Supplementary material for: Pop-up Questions Within Educational Videos: Effects on Students’ Learning
Source: Springer Nature journal article supplement (doi:10.1007/s10956-020-09847-3), 2020-08-06
Supplement: MOESM6 [file 18255218]

## Online Resource 6

Questionnaire on students' use of pop-up questions for study 4B (translated from Dutch)

### 1. What is your student number?

*Note: The questionnaire will be processed anonymously, you can reply honestly.*

### 2. When did you watch the video clips most often?

- a. I watched them before doing the individual tests at home.
- b. I watched them after doing the individual tests, but before corresponding in-class discussions.
- c. I watched them after corresponding in-class discussions, but before the exam.
- d. I did not watch the video clips.

### 3. What do you do first when you do not know the answer to a pop-up question within a video clip?

- a. I rewind the video
- b. I gamble the answer
- c. I search for the answer on internet
- d. I search for the answer in the textbook

### 4. How did you prepare for the exams of this course?

- a. I watched the video clips again
- b. I did the individual online tests again
- c. I studied the text book
- d. I read the summary
- e. I asked questions to fellow students on Facebook or group apps

### 5. Indicate what you do while watching video clips

- Take notes
- Pause the video
- Fast forward/Skip parts of the video
- Speed up the video
- Slow down the video
- Asking questions
- Click the "I am Confused" button
- Use the textbook
- Watch the video clips before the start of in-class discussions

*Never                      Sometimes                      Regularly                      Often                      Always*

|                          |                          |                          |                          |                          |
|--------------------------|--------------------------|--------------------------|--------------------------|--------------------------|
| <input type="checkbox"/> |
| <input type="checkbox"/> |
| <input type="checkbox"/> |
| <input type="checkbox"/> |
| <input type="checkbox"/> |
| <input type="checkbox"/> |
| <input type="checkbox"/> |
| <input type="checkbox"/> |
| <input type="checkbox"/> |

### 6. Indicate how strongly you agree or disagree with the following statements

- The pop-up questions within the video clips should be more difficult.
- The pop-up questions should be asked just at the end of the video clips.
- There should be more pop-up questions within the video clips.
- The online test questions should be more difficult.

*Strongly disagree                      Disagree                      Neutral                      Agree                      Strongly agree*

|                          |                          |                          |                          |                          |
|--------------------------|--------------------------|--------------------------|--------------------------|--------------------------|
| <input type="checkbox"/> |
| <input type="checkbox"/> |
| <input type="checkbox"/> |
| <input type="checkbox"/> |
