# Supplementary material for: Pop-up Questions Within Educational Videos: Effects on Students’ Learning
Source: Springer Nature journal article supplement (doi:10.1007/s10956-020-09847-3), 2020-08-06
Supplement: MOESM7 [file 18255218]

## Online Resource 7

Analysis of covariance on overall test performance for study 3 of students that watched a videoclip either with or without any pop-up questions, correcting for exam grades on other lesson content

**Online Resource 7.** ANCOVA results and descriptive statistics for experimental test scores of groups that watched a video clip on cell signaling either with (experimental group) or without (control group) pop-up questions. The experimental test contained questions on cell signaling and were scored from 0% to 100%. The experimental test scores were adjusted for the second exam grades of the course.

| Group              | Experimental test score |               |      |     |
|--------------------|-------------------------|---------------|------|-----|
|                    | Observed Mean           | Adjusted Mean | S.E. | N   |
| Experimental Group | 80%                     | 79%           | 1.17 | 105 |
| Control Group      | 74%                     | 75%           | 1.11 | 116 |

  

| Source                                 | SS    | df  | MS    | F     | p         |
|----------------------------------------|-------|-----|-------|-------|-----------|
| Second Exam Grade                      | 14106 | 1   | 14106 | 98.24 | <0.001*** |
| Control Group vs<br>Experimental Group | 1103  | 1   | 1103  | 7.68  | 0.006     |
| Error                                  | 31302 | 218 | 144   |       |           |

Note.  $R^2 = 0.34$ , Adj.  $R^2 = 0.33$ . The adjustments are based on second exam grade = 6.3. Homogeneity of regression was tested and not significant:  $F = 0.58$ ,  $p=0.362$  The second exam grade regression coefficient = 5.38\*\*\*.  
\*\*\* $p<0.001$
