# Supplementary material for: Pop-up Questions Within Educational Videos: Effects on Students’ Learning
Source: Springer Nature journal article supplement (doi:10.1007/s10956-020-09847-3), 2020-08-06
Supplement: MOESM8 [file 18255218]

## Online Resource 8

Replicate study on rewinding behavior throughout the course of a video for students that watched a videoclip either with or without any pop-up questions for study 4C

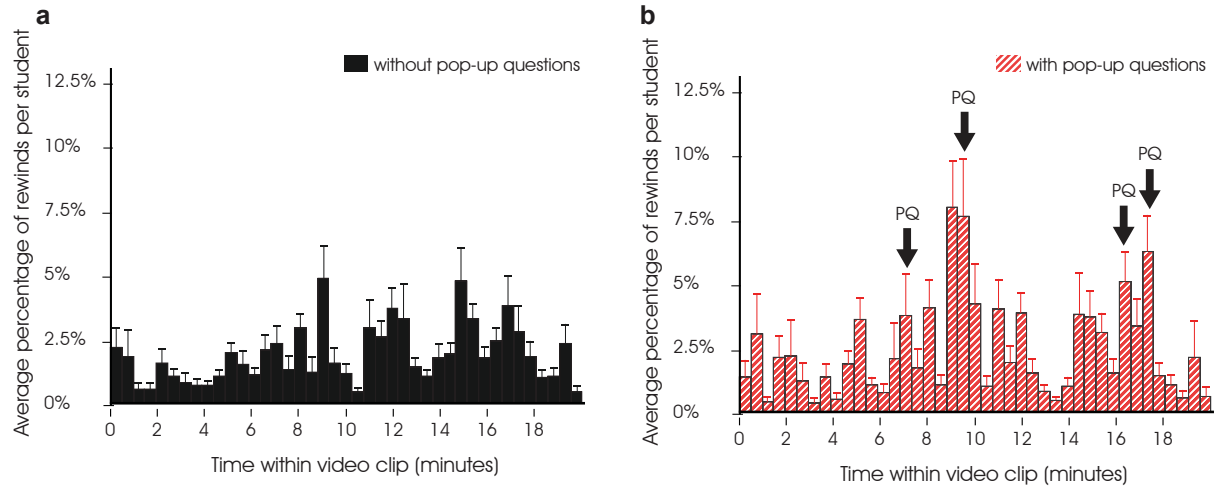

**Online Resource 8** Average percentage of rewinds per student within the time course of an educational video without (a) and with (b) pop-up questions. The percentages of rewinds are shown for every 30 seconds of the video for both the control group (N=121) and the experimental group (N=123). The arrows illustrate the time points of the pop-up questions at 7m22s, 9m53s, 16m57s and 17m42s. Error bars represent standard errors of the means.
