# Supplementary material for: Pop-up Questions Within Educational Videos: Effects on Students’ Learning
Source: Springer Nature journal article supplement (doi:10.1007/s10956-020-09847-3), 2020-08-06
Supplement: MOESM9 [file 18255218]

## Online Resource 9

Replicate study on the average rewinds and fast-forwards within a video for students that watched a videoclip either with or without any pop-up questions for study 4C

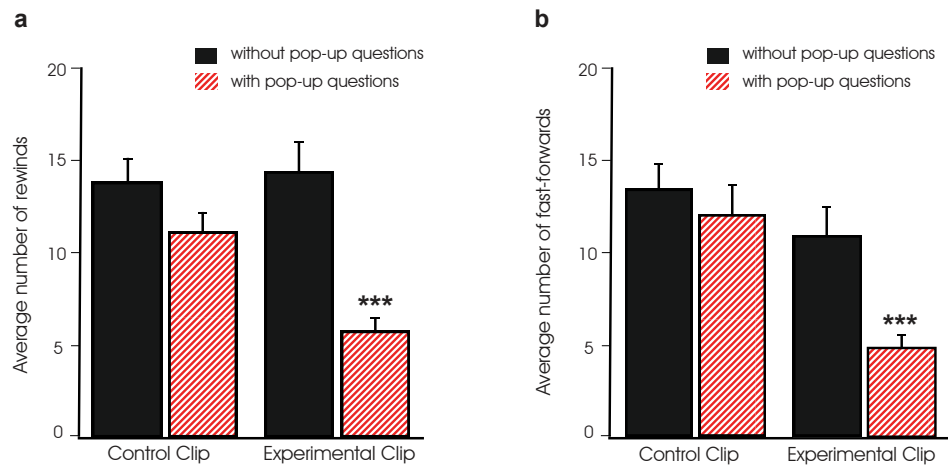

**Online Resource 9** Average number of rewinds (a) and fast-forwards (b) during videos with and without pop-up questions. The experimental video clip contained four pop-up questions for the experimental group (N=123) and no pop-up questions for the control group (N=121). The control video clip contained four pop-up questions for both the control group (N=132) and the experimental group (N=127). Error bars represent standard errors of the means.
